# Supplementary material
Source: Springer Nature journal article supplement (https://www.springermedizin.de/resource/supplementary/13051_2009_32_MOESM1_ESM.pdf/9669800)

**A**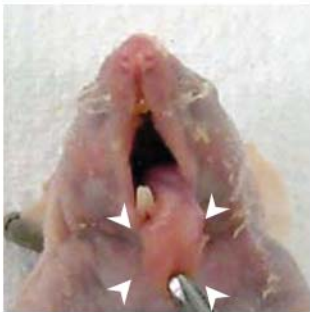**B**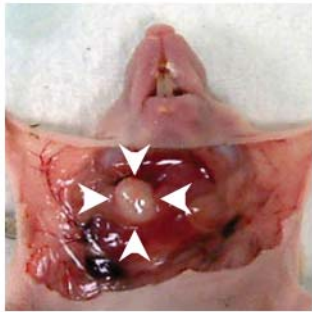**C**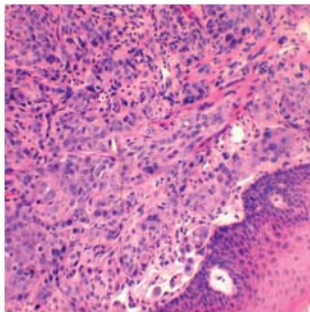**D**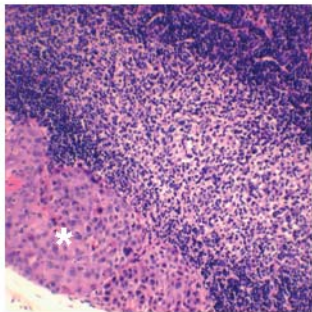

Supplement: MOESM1 [file 9669800]
